# Supplementary material for: Resources available for autism research in the big data era: a systematic review
Source: PeerJ. 2017 Jan 12;5:e2880. doi: 10.7717/peerj.2880 (PMC5237363; doi:10.7717/peerj.2880)
Supplement: File S1 [file peerj-05-2880-s001.xlsx]

## Sheet: ASD Data Resources
URL	Resource**	Number of Participants with ASD / Description	Metadata
https://ndar.nih.gov/	National Database for Autism Research (NDAR)* ¶	Over 80,203 participants (however this number includes the control participants of the ASD studies).	Hall D, Huerta M, McAuliffe M, Farber G. Sharing Heterogeneous Data: The National Database for Autism Research. Neuroinform. 2012;10(4):331-339.
			Novikova SI, Richman DM, Supekar K, Barnard-Brak L, Hall D. NDAR: A Model Federal System for Secondary Analysis in Developmental Disabilities Research. Int Rev Res Dev Disabil. 2013;45:123-153.
			Torgerson C, Quinn C, Dinov I, Liu Z, Petrosyan P, Pelphrey K, et al. Interacting with the National Database for Autism Research ( NDAR) via the LONI Pipeline workflow environment. Brain Imaging and Behavior. 2015;9(1):89-103.
			Payakachat N, Tilford J, Ungar W. National Database for Autism Research ( NDAR): big data opportunities for health services research and health technology assessment. Pharmacoeconomics. 2016;34(2):127-138.
http://sfari.org/	Simons Foundation Austim Research Initiative (SFARI)* ¶	Over 3,000 participants (SSC), over 200 participants (Simons VIP), 50,000† participants (SPARK).	Fischbach GD, Lord C. The Simons Simplex Collection: A Resource for Identification of Autism Genetic Risk Factors. Neuron. 2010 10/21;68(2):192-195.
			The simons vip consortium. Simons Variation in Individuals Project ( Simons VIP): A Genetics- First Approach to Studying Autism Spectrum and Related Neurodevelopmental Disorders. Neuron. 2012;73(6):1063-1067.
http://research.agre.org/program/descr.cfm	Autism Genetic Resource Exchange (AGRE)* ¶	Over 1,700 families with over 3,300 ASD participants.	Geschwind DH, Sowinski J, Lord C, Iversen P, Shestack J, Jones P, et al. The autism genetic resource exchange: a resource for the study of autism and related neuropsychiatric conditions. The American Journal of Human Genetics. 2001;69(2):463-466.
			Lajonchere CM. Changing the landscape of autism research: the autism genetic resource exchange. Neuron. 2010;68(2):187-191.
https://iancommunity.org/cs/for_researchers	Interactive Autism Network (IAN)*	Over 17,000 participants.	-
http://www.asd-uk.com/	Autism Spectrum Database-UK (ASD-UK)* ¶	Over 3,000 families.	Warnell F, George B, McConachie H, Johnson M, Hardy R, Parr JR. Designing and recruiting to UK autism spectrum disorder research databases: do they include representative children with valid ASD diagnoses? BMJ Open. 2015;5(9).
http://www.autismbrainnet.com/	Autism BrainNet	Over 25 donations (since 2014)†.	-
http://fcon_1000.projects.nitrc.org/indi/abide/	Autism Brain Imaging Data Exchange (ABIDE)	539 participants (ABIDE I), 487 participants (ABIDE II).	Di Martino A, Yan C-, Li Q, Denio E, Castellanos FX, Alaerts K, et al. The autism brain imaging data exchange: towards a large- scale evaluation of the intrinsic brain architecture in autism. Mol Psychiatry. 2014.
-	Australian EEG Database (AED)§	50 participants^.	Hunter M, Smith RLL, Hyslop W, Rosso OA, Gerlach R, Rostas JAP, et al. The Australian EEG database. Clinical EEG and neuroscience. 2005;36(2):76.
Brainmap.org	BrainMap‡	70 results / articles relevant to ASD functional data (search using BrainMapWeb).	Laird A, Lancaster J, Fox P. BrainMap: The Social Evolution of a Human Brain Mapping Database. Neuroinformatics. 2005;3(1):65-78.
			Laird AR, Eickhoff SB, Fox PM, Uecker AM, Ray KL, Saenz JJ, et al. The BrainMap strategy for standardization, sharing, and meta- analysis of neuroimaging data. BMC Research Notes. 2011;4:349-349.
http://neurovault.org/	NeuroVault	5 studies: 277, 60, 50, 13, 218 participants in each study.	Gorgolewski KJ, Varoquaux G, Rivera G, Schwarz Y, Ghosh SS, Maumet C, et al. NeuroVault.Org: A web-based repository for collecting and sharing unthresholded statistical maps of the human brain. Front Neuroinformatics. 2015;9(APR).
			Gorgolewski KJ, Varoquaux G, Rivera G, Schwartz Y, Sochat VV, Ghosh SS, et al. NeuroVault.org: A repository for sharing unthresholded statistical maps, parcellations, and atlases of the human brain. Neuroimage. 2016;124:1242-1244.
http://umcd.humanconnectomeproject.org/	USC Multimodal Connectivity Database	42 (fMRI) participants, 51 (DTI) participants.	Brown JA, Rudie JD, Bandrowski A, Van Horn JD, Bookheimer SY. The UCLA multimodal connectivity database: a web- based platform for brain connectivity matrix sharing and analysis. Frontiers in Neuroinformatics. 2012;6
			Brown JA, Van Horn JD. Connected brains and minds—The UMCD repository for brain connectivity matrices. Neuroimage. 2016 1/1;124, Part B:1238-1241.
http://datadryad.org/	Dryad	4 studies: 2, 34, 12, and 13 participants respectively.	-
https://figshare.com/	FigShare‡	Phenotypic, statistical, genetic data.	Singh J. FigShare. Journal of Pharmacology and Pharmacotherapeutics. 2011;2(2):138-139.
			Enis M. Industry: Figshare debuts repository platform. Libr J. 2013;138(16):21.
https://www.nimhgenetics.org/	NIMH Repository and Genomics Resource (NIMH-RGR)	Biospecimens: 4,793 families and 19,359 individuals of which 17,189 have DNA cell lines. Genome-Wide Association Studies (GWAS) Data: 4 studies (1,232 cases, 739 families, 943 families, 935 families). Sequence data (exome): 2,119 cases.	-
bristol.ac.uk/alspac/	Avon Longitudinal Study of Parents and Children (ALSPAC)||	96 participants (as identified via follow up questionnaires completed by carers for when the proband was 9 years old).	Golding J, Pembrey M, Jones R, Team AS. ALSPAC--the Avon Longitudinal Study of Parents and Children. I. Study methodology. Paediatr Perinat Epidemiol. 2001;15(1):74-87.
			Fraser A, Macdonald-Wallis C, Tilling K, Boyd A, Golding J, Davey Smith G, et al. Cohort Profile: the Avon Longitudinal Study of Parents and Children: ALSPAC mothers cohort. Int J Epidemiol. 2013;42(1):97-110.
https://catalog.coriell.org/	Coriell BioRepositories (including Autism Research Resource)	158 ASD cases.	-
https://neurobiobank.nih.gov/	NIH NeuroBioBank (NBB)	64 ASD cases. 22 ASD suspected.	-
http://www.kcl.ac.uk/ioppn/depts/bcn/Our-research/Neurodegeneration/brain-bank.aspx	MRC London Neurodegenerative Diseases Brain Bank	4 ASD cases.	-
https://www.mss.ng/	MSSNG ¶	10,000 participants. However, data from only 3000 probands is currently available.	-
gene.sfari.org	SFARI Gene	An up-to-date, manually annotated reference set of ASD-linked genes.	Banerjee-Basu S, Packer A. SFARI Gene: An evolving database for the autism research community. DMM Disease Models and Mechanisms. 2010;3(3-4):133-135.
			Abrahams BS, Arking DE, Campbell DB, Mefford HC, Morrow EM, Weiss LA, et al. SFARI Gene 2.0: a community-driven knowledgebase for the autism spectrum disorders (ASDs). Molecular Autism. 2013;4:36-36.
http://projects.tcag.ca/autism/	Autism Chromosome Rearrangement Database (ACRD)	A curated catalogue of structural variation related to ASD extracted from publicly available literature and unpublished data.	Marshall CR, Noor A, Vincent JB, Lionel AC, Feuk L, Skaug J, et al. Structural variation of chromosomes in autism spectrum disorder. The American Journal of Human Genetics. 2008 2/8;82(2):477-488.
http://autismkb.cbi.pku.edu.cn/index.php	Autism KB	A collection of genes and variations associated with ASD with annotations.	Xu L, Li J, Huang Y, Zhao M, Tang X, Wei L. AutismKB: an evidence-based knowledgebase of autism genetics. Nucleic Acids Res. 2012;40:D1016-D1022.
ncbi.nlm.nih.gov/guide/sitemap/	National Center for Biotechnology Information (NCBI)	A collection of multiple resources - omics and sequencing data.	Barrett T, Beck J, Benson DA, Bollin C, Bolton E, Bourexis D, et al. Database resources of the National Center for Biotechnology Information. Nucleic Acids Res. 2015;43(D1):D6-D17.
ebi.ac.uk/services/all	European Molecular Biology Laboratory (EMBL-EBI)	A collection of multiple resources - omics and sequencing data.	Brooksbank C, Bergman MT, Apweiler R, Birney E, Thornton J. The European Bioinformatics Institute's data resources 2014. Nucleic Acids Res. 2014;42:D18.
http://www.uniprot.org/	Universal Protein Resource (UniProt)	Can be found among EMBL-EBI resources. 91 (reviewed) and 346 (unreviewed) protein records associated with ASD.	UniProt: a hub for protein information. Nucleic Acids Res. 2015;43:D204.
https://www.ebi.ac.uk/ega/	The European Genome-phenome Archive (EGA)	Can be found among EMBL-EBI resources.	Lappalainen I, Jeff Almeida-King, Kumanduri V, Senf A, John DS, Saif Ur-Rehman, et al. The European Genome- phenome Archive of human data consented for biomedical research. Nat Genet. 2015;47(7):692.
http://thebiogrid.org/	Biological General Repository for Interaction Datasets (BioGRID)	Resource that archives and disseminates genetic and protein interaction data.	Stark C, Breitkreutz BJ, Reguly T, Boucher L, Breitkreutz A, Tyers M. BioGRID: a general repository for interaction datasets. Nucleic Acids Res. 2006;34(Database issue):D535-539.
			Chatr-Aryamontri A, Breitkreutz B-, Oughtred R, Boucher L, Heinicke S, Chen D, et al. The BioGRID interaction database: 2015 update. Nucleic Acids Res. 2015;43(D1):D470-D478.
http://gpmdb.thegpm.org/index.html	Global Proteome Machine Database (GPM DB)	Open-source system for analyzing, storing, and validating proteomics information derived from tandem mass spectrometry.	Craig R, Cortens JP, Beavis RC. Open source system for analyzing, validating, and storing protein identification data. Journal of proteome research. 2004;3(6):1234.
http://www.peptideatlas.org/	PeptideAtlas	A collection of peptides identified in a large set of tandem mass spectrometry proteomics experiments.	Desiere F, Deutsch EW, Nesvizhskii AI, Mallick P, King NL, Eng JK, et al. Integration with the human genome of peptide sequences obtained by high- throughput mass spectrometry. Genome Biol. 2005;6(1):R9-R9.
			Deutsch EW, Sun Z, Campbell D, Kusebauch U, Chu CS, Mendoza L, et al. State of the human proteome in 2014/2015 As viewed through peptideatlas: Enhancing accuracy and coverage through the atlas prophet. J Proteome Res. 2015;14(9):3461-3473.
http://www.ddbj.nig.ac.jp/index-e.html	DNA DataBank of Japan (DDBJ)	Annotated collection of all publicly available nucleotide sequences and their translated amino acid sequences.	Tateno Y, Imanishi T, Miyazaki S, Fukami-Kobayashi K, Saitou N, Sugawara H, et al. DNA Data Bank of Japan ( DDBJ) for genome scale research in life science. Nucleic Acids Res. 2002;30(1):27.
			Kodama Y, Mashima J, Kaminuma E, Gojobori T, Ogasawara O, Takagi T, et al. The DNA Data Bank of Japan launches a new resource, the DDBJ Omics Archive of functional genomics experiments. Nucleic Acids Res. 2012;40:D38.
http://www.chr7.org/	The Chromosome 7 Annotation Project	84 cases.	Scherer SW, Cheung J, Macdonald JR, Osborne LR, Nakabayashi K, Herbrick J, et al. Human chromosome 7: DNA sequence and biology. Science. 2003;300(5620):767.
http://www.mirbase.org/	miRBase: the microRNA database	miRNA sequences and annotation.	Kozomara A, Griffiths-Jones S. miRBase: annotating high confidence microRNAs using deep sequencing data. Nucleic Acids Res. 2014;42:D68.
http://gbrowse.csbio.unc.edu/cgi-bin/gb2/gbrowse/slep/	Sullivan Lab Evidence Project (SLEP)	Findings from genome wide linkage (GWL), genome wide association (GWA), and microarray (MA) studies for ASD.	Konneker T, Barnes T, Furberg H, Losh M, Bulik CM, Sullivan PF. A searchable database of genetic evidence for psychiatric disorders. American Journal of Medical Genetics Part B: Neuropsychiatric Genetics. 2008;147(6):671-675.
** Resources listed in this table contain data either from individuals with ASD or data relevant to ASD research that is collected from non-affected individuals (e.g. from individuals with certain genetic profiles or syndromes related to ASD research).
* Data-type is described in more detail in the corresponding tab in this file.
† The data is not yet available: It is intended to be available in a future date according to the SFARI website.
¶ In relation to phenotypic / clinical data, there is generally a mix of item-level data and score-only data. In relation to other data-types, there is generally a mix of raw and processed data available. For more specific information, it is advised to contact these resources directly (in addition to viewing their websites and metadata articles listed in this table).
§ There is no website or portal for the AED resource; however, the data is available via email requests to aed@newcastle.edu.au
^ The approximate number of ASD participants was found via email correspondence with aed@newcastle.edu.au
‡ Accurate information regarding the approximate number of participants with ASD is not readily available on the website, due to the nature of the search functionality.
|| Data specifically from ASD participants are not necessarily available in all the different data types described in Table 2 (therefore further specific enquiries directed to the ALSPAC team is advised).

## Sheet: NDAR
Phenotypic Data	Neuroimaging Data	#*	Omics Data	#*	Notes
NDAR category: Autism Spectrum Affected, Autism Spectrum Mildly Affected, Autism Spectrum Severely Affected, Fragile X	EEG	0^	DNA data (Microarray and Sequencing)	9350	* The numbers only represent numbers of ASD participants excluding control, neurotypical, sibling, parental, and undefined participants.
Clinical diagnosis: Autism Spectrum Affected, Autism Spectrum Mildly Affected, Autism Spectrum Severely Affected, Fragile X	MEG	21	RNA (Microarray and Sequencing)	807	^ This number was found via email correspondence with NDAR, which differed from the number that was displayed on the NDAR platform. This is due to the numbers displayed in the platform also representing neurotypicals taking part in ASD studies. Therefore, the number of EEG participants displayed in the platform were only indicative of neurotypicals.
ADI score	PET	127	iPSC (induced pluripotent stem cells)	1
ADI clinical diagnosis	DTI	312
ADOS score	fMRI	527
ADOS clinical diagnosis	MRI	453
Verbal IQ	Spectroscopy	65
Non-verbal IQ
Vineland score
Subtype min verbal
Subtype seizure

## Sheet: SFARI
SSC Initative				Simons VIP Initiative						SFARI Gene Initiative		SPARK Initiative
SSC Phenotypic Data	SSC Biospecimens	SSC Genetic Data	SSC Genetic Data (associated publication)	Simons VIP Phenotypic Data	Simons VIP Neuroimaging Data	Simons VIP Biospecimens	Simons VIP Genetic Data	Simons VIP Genetic Data (associated publication)	Notes	SFARI Gene Metadata	SFARI Gene	General Data Type Announced	#
Aberrant Behavior Checklist (ABC)	DNA samples	Single nucleotide polymorphism (SNP) genotype data	Sanders S.J. et al. Neuron 70, 863-885 (2011)	Vineland Adaptive Behavior Scales	EEG* (50 participants (based on email correspondence))	DNA samples	Single nucleotide polymorphism (SNP) genotype data	Duyzend M.H. et al. Am. J. Hum. Genet. 98, 45-57 (2016)	The Simons VIP is a ‘genetics-first’ research initiative that aims to identify and study a large number of individuals with a recurrent genetic variation (deletion or duplication of the chromosomal segment 16p11.2) that increases the risk of developing autism spectrum and other neurodevelopmental disorders.	http://dmm.biologists.org/content/3/3-4/133.full?ijkey=10cd79692795053ac34e08accf57d62d0354c1ed&keytype2=tf_ipsecsha	A collection of ASD-linked genes and their annotations.	Genetic and phenotypic data will be made available in addition for potential participant recruitment services.	50,000 participants
Autism Diagnostic Interview-Revised (ADI-R)	Lymphoblastoid Cell Lines	Whole-genome sequencing data	Turner T. et al. Am. J. Hum. Genet. 98, 58-74 (2016)	Autism Diagnostic Interview – Revised (ADI-R)	MRI	Lymphoblastoid Cell Lines	Whole-exome sequencing data	Daly M.J. et al. (in preparation)	All participants identified with the specified genetic mutation were eligible for inclusion in the study regardless of diagnosis.			https://www.simonsfoundation.org/features/foundation-news/sfari-launches-spark-online-research-initiative/
Autism Diagnostic Observation Schedule (ADOS)	Plasma samples			Autism Diagnostic Observation Schedule (ADOS)	fMRI	Cryropreserved Fibroblasts			The Simons VIP started with a focus on deletion (del) and duplication (dup) of chromosomal region 16p11.2, later adding individuals with 1q21.1 deletion or duplication as a small pilot.
Brief family physical and dysmorphology examination				Autism Diagnostic Observation Schedule - Toddler (ADOS-T)	MEG				The Simons VIP has collected detailed clinical information and blood samples from more than 200 carriers and their families, with the immediate goal of identifying medical, cognitive, neural and behavioral profiles shared by this group.
Child Behavior Checklist (CBCL) OR Adult Behavior Checklist (ABCL)				Delis-Kaplan Executive Function System (DKEFS)					Extensive psychological and neurological testing, along with neuroimaging — magnetic resonance imaging (MRI), functional magnetic resonance imaging (fMRI) and magnetoencephalography (MEG) — with a uniform protocol, was completed
Cognitive testing				Purdue Pegboard
Developmental Coordination Disorder Questionnaire (DCDQ)				Movement ABC-2
Diagnosis Summary Form				Differential Ability Scales - Early Years & School Age (DAS-II)
Non-Word Repetition Task (CTOPP)				Mullen Scales of Early Learning
Peabody Picture Vocabulary Test, Fourth Edition (PPVT-4)				Wechsler Abbreviated Scale of Intelligence (WASI)
Purdue Peg Board Test				Comprehensive Assessment of Spoken Language (CASL)
Raven’s Standard Progressive Matrices				Childrens Communication Checklist - 2 (CCC-2)
Repetitive Behavior Scale-Revised (RBS-R)				Clinical Evaluation of Language Fundamentals (CELF-4)
Social Communication Questionnaire (SCQ) - Parent report				Comprehensive Test of Phonological Processing (CTOPP) - Nonword Repetition
Social Communication Questionnaire (SCQ) - Teacher report				MacArthur Communicative Development Inventory (MCDI)
Social Responsiveness Scale (SRS) – Parent report				Wechsler Individual Achievement Test (WIAT) - Word Reading, Reading Comprehension, Numerical Operations, Sentence Composition
Social Responsiveness Scale (SRS) – Teacher report				Adult Behavior Checklist (ABCL)
SSC Background History Form				Child Behavior Checklist - 1.5 - 5yrs, 6 - 18yrs versions (CBCL)
SSC Family Pedigree Form				Diagnostic Interview Schedule for Children - Young Child Edition (DISC-YC)
SSC Height, Weight, Head Circumference Form				Diagnostic Interview Schedule for Children (DISC) - Revised version
SSC Medical History Interview				Symptom Checklist 90 - Revised (SCL-90)
SSC Temperature Form				Broader Autism Phenotype Questionnaire (BAPQ)
SSC Treatment History Form				Social Communication Questionnaire (SCQ) - Lifetime Version
Teacher Report Form (TRF), OR Caregiver-Teacher Report Form (C-TRF)				Social Responsiveness Scale (SRS)
Vineland Adaptive Behavior Scale, Second Edition (VABS-II)				Social Responsiveness Scale- Adult Research Version (SRS-ARV)
				Behavior and Stereotyped Interest Questionnaire (BSIQ)
				Parenting Stress Index (PSI) - Short Form
				Simons VIP Background History Form
				Simons VIP Diagnosis Summary Form
				3dMD pictures
				Education History Interview
				Intervention History Interview
				Family Structure Form (Pedigree)
				Simons VIP Child and Teen Feeding Questionnaires
				Eating in Absence of Hunger Questionnaire - Parent report and Self report
				Loss of Control - Eating Questionnaire-Parent report and Self report
				Structural MRI Scan Results Form
				Epilepsy Interview Form
				Medication Interview-Parent report and Self report versions
				Medical History Interview - Pediatric and Adult Versions
				Mother Pregnancy Questionnaire
				Mother Other Pregnancy Questionnaire
				Neurologic Record Review Form
				Simons VIP Previous Diagnoses Interview Form - Parent report and Self report versions
				Puberty Questionnaire
				Edinburgh Handedness Inventory - Parent report and Self report versions
				Growth Measurements
				Height, Weight, Head Circumference
				Genetic Lab Results Form
				Neurological Examination
				Simons VIP Pediatric and Adult Sleep Questionnaires

## Sheet: AGRE
Phenotypic Data	Medical Data	Genotypic Data & Biospecimens
ADI-R and ADOS scores with all interview data points and computer scored algorithm	Physical and neurological exams for children, both affected and unaffected (limited to a subset of AGRE families)	High-density SNP
Cognitive assessments and other interview forms/questionnaires	Medical history for children and parents	Whole Genome Scan and Finemapping
Medical histories, environmental exposure histories, and physical neurological exam data are available for a subset of our population	Handedness questionnaire	Genome-wide High-density 10K SNP data on 426 families from the Autism Genome Project (AGP)
Peabody Picture Vocabulary Test (PPVT)	Language questionnaire for unaffected children and parents	Zygosity
Raven Coloured Progressive Matrices	Head circumference	Fragile X screening (one child per family)
Vineland Adaptive Behavior Scales		Karyotyping or chromosomal analysis
Social Communication Questionnaire (SCQ)		Candidate gene data
Repetitive Behavior Scale		Cell lines, DNA, plasma and whole blood samples
Stanford Binet Intelligence Scales, 5th Edition (SB-5)		173 families with blood samples
Social Responsiveness Scale (SRS)
Language Questionnaire

## Sheet: IAN
Phenotypic Data
CHILD ON THE AUTISM SPECTRUM QUESTIONNAIRES
Child with an ASD
Social Responsiveness Scale (SRS)
Social Communication Questionnaire (SCQ)
Treatment List and Questionnaire for Each Treatment
FAMILY QUESTIONNAIRES
Basic Family Information
Mother Basic Medical History
Father Basic Medical History
Sibling without an ASD
ADULT ON THE AUTISM SPECTRUM QUESTIONNAIRES
Adult with ASD Questionnaire - for independent adults with ASD
Adult with ASD Questionnaire - for guardians of dependent adults with ASD
PAST IAN SPECIAL QUESTIONNAIRES
CHASE Moving Study
Grandparents of Children with ASD Survey
Parental Depression History Questionnaire
Vaccine Questionnaire
Weight and Height Questionnaire
Pregnancy and Birth Questionnaire
Bullying and Children with ASD
Wandering (or Elopement) and Children with ASD

## Sheet: ASD-UK
Phenotypic Data
Child’s name, DOB & gender
ASD diagnosis, age at diagnosis, and diagnosing clinician
Additional diagnoses; e.g. ADHD, learning disability, dyslexia, dyspraxia, epilepsy
Information about child’s learning ability; estimates of age equivalent of child’s ability
Level of support required
Left or right handed
Speech & language, age at first speech
Current school
Emotional and behavioural issues
Loss previously acquired skills (regression)
Siblings with ASD, family history of ASD or behavioural rigidity (Broader Autism Phenotype)
Social communication – as measured by the Social Communication Questionnaire
